# Supplementary material
Source: MDPI journal article supplement (https://www.mdpi.com/search?q=molbank-2021-M1269)
Supplement: s002 [file molbank-2021-M1269-s002.inchi]

InChI=1S/C19H16N2O/c1-15-2-7-17(8-3-15)19(22)11-6-16-4-9-18(10-5-16)21-13-12-20-14-21/h2-14H,1H3/b11-6+
AuxInfo=1/0/N:10,3,5,13,17,11,2,6,14,16,8,21,22,19,4,12,1,15,7,20,18,9/E:(2,3)(4,5)(7,8)(9,10)/rA:22CCCCCCCCOCCCCCCCCNCNCC/rB:d1;s2;d3;s4;s1d5;s1;s7;d7;s4;d8;s11;d12;s13;d14;s15;s12d16;s15;s18;d19;s20;s18d21;/rC:3.886,.9259,0;3.886,-.6141,0;5.2198,-1.3841,0;6.5533,-.6141,0;6.5533,.9259,0;5.2198,1.6959,0;2.5523,1.6959,0;1.2187,.9259,0;2.5523,3.2359,0;7.887,-1.3841,0;-.115,1.6959,0;-1.4487,.9259,0;-2.7825,1.6959,0;-4.116,.9259,0;-4.116,-.6141,0;-2.7825,-1.3841,0;-1.4487,-.6141,0;-5.4497,-1.3841,0;-6.8566,-.7577,0;-7.887,-1.9021,0;-7.117,-3.2359,0;-5.6106,-2.9157,0;
